# Supplementary material for: Psychometric analysis of the modified COVID-19 Yorkshire Rehabilitation Scale (C19-YRSm) in a prospective multicentre study
Source: PubMed Central journal article supplement — BMJ Open Respir Res. 2024 May 9;11(1):e002271. doi: 10.1136/bmjresp-2023-002271 (PMC11086182; doi:10.1136/bmjresp-2023-002271), 2024-05-09
Supplement: bmjresp-2023-002271supp001.pdf [file bmjresp-2023-002271supp001.pdf]

## Modified COVID-19 Yorkshire Rehabilitation Scale (C19-YRSm)

### Self-report version

Patient name:

Hospital number:

Date:

Time:

*The purpose of this questionnaire is to find out more about your current problems following COVID-19 illness. Your responses will be recorded in your clinical notes. We will use this information to monitor your symptoms, offer treatments and assess your response to treatment.*

*This questionnaire will take around 10 minutes. If there are any topics you don't want to talk about you can choose not to respond.*

*Do you consent for this information to be used for audit and research as well? Yes  No*

#### SYMPTOM SEVERITY

*Please answer the questions below to the best of your knowledge.*

*'Now' refers to how you feel now/this week (last 7 days).*

*"Pre-COVID" refers to how you were feeling prior to contracting the illness.*

*If you are unable to recall this, just state 'don't know'*

*Rate the severity of each problem on a scale of 0-3:*

**0 = None; no problem**

**1 = Mild problem; does not affect daily life**

**2 = Moderate problem; affects daily life to a certain extent**

**3 = Severe problem; affects all aspects of daily life; life-disturbing**

| 1. Breathlessness                          | Breathlessness:                                                     | Now                                                                                                         | Pre-COVID                                                                                                   |
|--------------------------------------------|---------------------------------------------------------------------|-------------------------------------------------------------------------------------------------------------|-------------------------------------------------------------------------------------------------------------|
|                                            | a) At rest                                                          | 0 <input type="checkbox"/> 1 <input type="checkbox"/> 2 <input type="checkbox"/> 3 <input type="checkbox"/> | 0 <input type="checkbox"/> 1 <input type="checkbox"/> 2 <input type="checkbox"/> 3 <input type="checkbox"/> |
|                                            | b) Changing position e.g. from lying to sitting or sitting to lying | 0 <input type="checkbox"/> 1 <input type="checkbox"/> 2 <input type="checkbox"/> 3 <input type="checkbox"/> | 0 <input type="checkbox"/> 1 <input type="checkbox"/> 2 <input type="checkbox"/> 3 <input type="checkbox"/> |
|                                            | c) On dressing yourself                                             | 0 <input type="checkbox"/> 1 <input type="checkbox"/> 2 <input type="checkbox"/> 3 <input type="checkbox"/> | 0 <input type="checkbox"/> 1 <input type="checkbox"/> 2 <input type="checkbox"/> 3 <input type="checkbox"/> |
|                                            | d) On walking up a flight of stairs                                 | 0 <input type="checkbox"/> 1 <input type="checkbox"/> 2 <input type="checkbox"/> 3 <input type="checkbox"/> | 0 <input type="checkbox"/> 1 <input type="checkbox"/> 2 <input type="checkbox"/> 3 <input type="checkbox"/> |
| 2. Cough/ throat sensitivity/ voice change | Cough/ throat sensitivity                                           | 0 <input type="checkbox"/> 1 <input type="checkbox"/> 2 <input type="checkbox"/> 3 <input type="checkbox"/> | 0 <input type="checkbox"/> 1 <input type="checkbox"/> 2 <input type="checkbox"/> 3 <input type="checkbox"/> |
|                                            | Change of voice                                                     | 0 <input type="checkbox"/> 1 <input type="checkbox"/> 2 <input type="checkbox"/> 3 <input type="checkbox"/> | 0 <input type="checkbox"/> 1 <input type="checkbox"/> 2 <input type="checkbox"/> 3 <input type="checkbox"/> |

|                                                    |                                                                                   |                                                                                                             |                                                                                                             |
|----------------------------------------------------|-----------------------------------------------------------------------------------|-------------------------------------------------------------------------------------------------------------|-------------------------------------------------------------------------------------------------------------|
| 3. Fatigue (tiredness not improved by rest)        | Fatigue levels in your usual activities                                           | 0 <input type="checkbox"/> 1 <input type="checkbox"/> 2 <input type="checkbox"/> 3 <input type="checkbox"/> | 0 <input type="checkbox"/> 1 <input type="checkbox"/> 2 <input type="checkbox"/> 3 <input type="checkbox"/> |
| 4. Smell/taste                                     | Altered smell                                                                     | 0 <input type="checkbox"/> 1 <input type="checkbox"/> 2 <input type="checkbox"/> 3 <input type="checkbox"/> | 0 <input type="checkbox"/> 1 <input type="checkbox"/> 2 <input type="checkbox"/> 3 <input type="checkbox"/> |
|                                                    | Altered taste                                                                     | 0 <input type="checkbox"/> 1 <input type="checkbox"/> 2 <input type="checkbox"/> 3 <input type="checkbox"/> | 0 <input type="checkbox"/> 1 <input type="checkbox"/> 2 <input type="checkbox"/> 3 <input type="checkbox"/> |
| 5. Pain/discomfort                                 | Chest pain                                                                        | 0 <input type="checkbox"/> 1 <input type="checkbox"/> 2 <input type="checkbox"/> 3 <input type="checkbox"/> | 0 <input type="checkbox"/> 1 <input type="checkbox"/> 2 <input type="checkbox"/> 3 <input type="checkbox"/> |
|                                                    | Joint pain                                                                        | 0 <input type="checkbox"/> 1 <input type="checkbox"/> 2 <input type="checkbox"/> 3 <input type="checkbox"/> | 0 <input type="checkbox"/> 1 <input type="checkbox"/> 2 <input type="checkbox"/> 3 <input type="checkbox"/> |
|                                                    | Muscle pain                                                                       | 0 <input type="checkbox"/> 1 <input type="checkbox"/> 2 <input type="checkbox"/> 3 <input type="checkbox"/> | 0 <input type="checkbox"/> 1 <input type="checkbox"/> 2 <input type="checkbox"/> 3 <input type="checkbox"/> |
|                                                    | Headache                                                                          | 0 <input type="checkbox"/> 1 <input type="checkbox"/> 2 <input type="checkbox"/> 3 <input type="checkbox"/> | 0 <input type="checkbox"/> 1 <input type="checkbox"/> 2 <input type="checkbox"/> 3 <input type="checkbox"/> |
|                                                    | Abdominal pain                                                                    | 0 <input type="checkbox"/> 1 <input type="checkbox"/> 2 <input type="checkbox"/> 3 <input type="checkbox"/> | 0 <input type="checkbox"/> 1 <input type="checkbox"/> 2 <input type="checkbox"/> 3 <input type="checkbox"/> |
| 6. Cognition                                       | Problems with concentration                                                       | 0 <input type="checkbox"/> 1 <input type="checkbox"/> 2 <input type="checkbox"/> 3 <input type="checkbox"/> | 0 <input type="checkbox"/> 1 <input type="checkbox"/> 2 <input type="checkbox"/> 3 <input type="checkbox"/> |
|                                                    | Problems with memory                                                              | 0 <input type="checkbox"/> 1 <input type="checkbox"/> 2 <input type="checkbox"/> 3 <input type="checkbox"/> | 0 <input type="checkbox"/> 1 <input type="checkbox"/> 2 <input type="checkbox"/> 3 <input type="checkbox"/> |
|                                                    | Problems with planning                                                            | 0 <input type="checkbox"/> 1 <input type="checkbox"/> 2 <input type="checkbox"/> 3 <input type="checkbox"/> | 0 <input type="checkbox"/> 1 <input type="checkbox"/> 2 <input type="checkbox"/> 3 <input type="checkbox"/> |
| 7. Palpitations/dizziness                          | Palpitations in certain positions, activity or at rest                            | 0 <input type="checkbox"/> 1 <input type="checkbox"/> 2 <input type="checkbox"/> 3 <input type="checkbox"/> | 0 <input type="checkbox"/> 1 <input type="checkbox"/> 2 <input type="checkbox"/> 3 <input type="checkbox"/> |
|                                                    | Dizziness in certain positions, activity or at rest                               | 0 <input type="checkbox"/> 1 <input type="checkbox"/> 2 <input type="checkbox"/> 3 <input type="checkbox"/> | 0 <input type="checkbox"/> 1 <input type="checkbox"/> 2 <input type="checkbox"/> 3 <input type="checkbox"/> |
| 8. Post-exertional malaise (worsening of symptoms) | Crashing or relapse hours or days after physical, cognitive or emotional exertion | 0 <input type="checkbox"/> 1 <input type="checkbox"/> 2 <input type="checkbox"/> 3 <input type="checkbox"/> | 0 <input type="checkbox"/> 1 <input type="checkbox"/> 2 <input type="checkbox"/> 3 <input type="checkbox"/> |
| 9. Anxiety/ mood                                   | Feeling anxious                                                                   | 0 <input type="checkbox"/> 1 <input type="checkbox"/> 2 <input type="checkbox"/> 3 <input type="checkbox"/> | 0 <input type="checkbox"/> 1 <input type="checkbox"/> 2 <input type="checkbox"/> 3 <input type="checkbox"/> |
|                                                    | Feeling depressed                                                                 | 0 <input type="checkbox"/> 1 <input type="checkbox"/> 2 <input type="checkbox"/> 3 <input type="checkbox"/> | 0 <input type="checkbox"/> 1 <input type="checkbox"/> 2 <input type="checkbox"/> 3 <input type="checkbox"/> |
|                                                    | Having unwanted memories of your illness or time in hospital                      | 0 <input type="checkbox"/> 1 <input type="checkbox"/> 2 <input type="checkbox"/> 3 <input type="checkbox"/> | 0 <input type="checkbox"/> 1 <input type="checkbox"/> 2 <input type="checkbox"/> 3 <input type="checkbox"/> |
|                                                    | Having unpleasant dreams about your illness or time in hospital                   | 0 <input type="checkbox"/> 1 <input type="checkbox"/> 2 <input type="checkbox"/> 3 <input type="checkbox"/> | 0 <input type="checkbox"/> 1 <input type="checkbox"/> 2 <input type="checkbox"/> 3 <input type="checkbox"/> |
|                                                    | Trying to avoid thoughts or feelings about your illness or time in hospital       | 0 <input type="checkbox"/> 1 <input type="checkbox"/> 2 <input type="checkbox"/> 3 <input type="checkbox"/> | 0 <input type="checkbox"/> 1 <input type="checkbox"/> 2 <input type="checkbox"/> 3 <input type="checkbox"/> |
| 10. Sleep                                          | Sleep problems, such as difficulty falling asleep, staying asleep or oversleeping | 0 <input type="checkbox"/> 1 <input type="checkbox"/> 2 <input type="checkbox"/> 3 <input type="checkbox"/> | 0 <input type="checkbox"/> 1 <input type="checkbox"/> 2 <input type="checkbox"/> 3 <input type="checkbox"/> |

**FUNCTIONAL ABILITY**

| 11. Communication                    | Difficulty with communication/word finding difficulty/understanding others                                                                                      | Now                                                                                                         | Pre-COVID                                                                                                   |
|--------------------------------------|-----------------------------------------------------------------------------------------------------------------------------------------------------------------|-------------------------------------------------------------------------------------------------------------|-------------------------------------------------------------------------------------------------------------|
|                                      |                                                                                                                                                                 | 0 <input type="checkbox"/> 1 <input type="checkbox"/> 2 <input type="checkbox"/> 3 <input type="checkbox"/> | 0 <input type="checkbox"/> 1 <input type="checkbox"/> 2 <input type="checkbox"/> 3 <input type="checkbox"/> |
| 12. Walking or moving around         | Difficulties with walking or moving around                                                                                                                      | 0 <input type="checkbox"/> 1 <input type="checkbox"/> 2 <input type="checkbox"/> 3 <input type="checkbox"/> | 0 <input type="checkbox"/> 1 <input type="checkbox"/> 2 <input type="checkbox"/> 3 <input type="checkbox"/> |
| 13. Personal care                    | Difficulties with personal tasks such as using the toilet or getting washed and dressed                                                                         | 0 <input type="checkbox"/> 1 <input type="checkbox"/> 2 <input type="checkbox"/> 3 <input type="checkbox"/> | 0 <input type="checkbox"/> 1 <input type="checkbox"/> 2 <input type="checkbox"/> 3 <input type="checkbox"/> |
| 14. Other activities of Daily Living | Difficulty doing wider activities, such as household work, leisure/sporting activities, paid/unpaid work, study or shopping                                     | 0 <input type="checkbox"/> 1 <input type="checkbox"/> 2 <input type="checkbox"/> 3 <input type="checkbox"/> | 0 <input type="checkbox"/> 1 <input type="checkbox"/> 2 <input type="checkbox"/> 3 <input type="checkbox"/> |
| 15. Social role                      | Problems with socialising/interacting with friends* or caring for dependants<br><br>*related to your illness and not due to social distancing/lockdown measures | 0 <input type="checkbox"/> 1 <input type="checkbox"/> 2 <input type="checkbox"/> 3 <input type="checkbox"/> | 0 <input type="checkbox"/> 1 <input type="checkbox"/> 2 <input type="checkbox"/> 3 <input type="checkbox"/> |

**OTHER SYMPTOMS**

Please select any of the following symptoms you have experienced since your illness in the last 7 days. Please also select any previous problems that have worsened for you following your illness.

- Fever
- Skin rash/ discolouration of skin
- New allergy such as medication, food etc
- Hair loss
- Skin sensation (numbness/tingling/itching/nerve pain)
- Dry eyes/ redness of eyes
- Swelling of feet/ swelling of hands
- Easy bruising/ bleeding
- Visual changes
- Difficulty swallowing solids
- Difficulty swallowing liquids
- Balance problems or falls
- Weakness or movement problems or coordination problems in limbs
- Tinnitus
- Nausea
- Dry mouth/mouth ulcers
- Acid Reflux/heartburn
- Change in appetite
- Unintentional weight loss
- Unintentional weight gain
- Bladder frequency,urgency or incontinence

- Constipation, diarrhoea or bowel incontinence
- Change in menstrual cycles or flow
- Waking up at night gasping for air (also called sleep apnea)
- Thoughts about harming yourself

Other symptoms – free text

#### OVERALL HEALTH

How good or bad is your health overall in the last 7 days?

For this question, a score of 10 means the BEST health you can imagine. 0 means the WORST health you can imagine.

a) Now: WORST HEALTH 0  1  2  3  4  5  6  7  8  9  10  BEST HEALTH

b) Pre-Covid: WORST HEALTH 0  1  2  3  4  5  6  7  8  9  10  BEST HEALTH

#### EMPLOYMENT

Occupation: \_\_\_\_\_

Has your COVID-19 illness affected your work?

- No change
- On reduced working hours
- On sickness leave
- Changes made to role/ working arrangements (such as working from home or lighter duties)
- Had to retire/ change job
- Lost job

Any other comments/concerns: \_\_\_\_\_

#### PARTNER/FAMILY/CARER PERSPECTIVE

This is space for your partner, family or carer to add anything from their perspective:
