# Supplementary material for: Psychometric analysis of the modified COVID-19 Yorkshire Rehabilitation Scale (C19-YRSm) in a prospective multicentre study
Source: PubMed Central journal article supplement — BMJ Open Respir Res. 2024 May 9;11(1):e002271. doi: 10.1136/bmjresp-2023-002271 (PMC11086182; doi:10.1136/bmjresp-2023-002271), 2024-05-09
Supplement: bmjresp-2023-002271supp003.pdf [file bmjresp-2023-002271supp003.pdf]

**Supplementary Table 1a. C19-YRSm subscale mean domain scores by symptom burden (“Other Symptoms”)**

| Domain                              | Low, N = 507 <sup>1</sup> | Medium, N = 441 <sup>1</sup> | High, N = 396 <sup>1</sup> | p-value <sup>2</sup> |
|-------------------------------------|---------------------------|------------------------------|----------------------------|----------------------|
| <b>Symptom Severity (0-30)</b>      | 14.6 (4.8)                | 18.8 (4.5)                   | 22.8 (4.2)                 | <0.001               |
| <b>Functional Disability (0-15)</b> | 5.1 (3.1)                 | 7.0 (3.3)                    | 9.9 (3.3)                  | <0.001               |
| <b>Overall Health (0-10)</b>        | 5.1 (1.8)                 | 4.4 (1.7)                    | 3.8 (1.8)                  | <0.001               |

<sup>1</sup>Mean (Standard Deviation); <sup>2</sup>Kruskal-Wallis rank sum test; Low, Medium, High based on tertiles of the “Other Symptom” domain

**Supplementary Table 1b. C19-YRSm subscale mean scores by hospital admission**

| Hospital Admission                  | No, N = 1179 <sup>1</sup> | Yes, N = 134 <sup>1</sup> | p-value <sup>2</sup> |
|-------------------------------------|---------------------------|---------------------------|----------------------|
| <b>Symptom Severity (0-30)</b>      | 18.3 (5.6)                | 19.3 (6.0)                | 0.07                 |
| <b>Functional Disability (0-15)</b> | 7.0 (3.7)                 | 8.0 (4.2)                 | 0.03                 |
| <b>Overall Health (0-10)</b>        | 5.0 (1.9)                 | 4.5 (1.9)                 | 0.8                  |

<sup>1</sup>Mean (Standard Deviation); <sup>2</sup>Mann-Whitney-Wilcoxon rank sum test; Missing values, N=8

**Supplementary Table 1c. C19-YRSm subscale mean scores by ICU admission**

| Characteristic                      | No, N = 1,283 <sup>1</sup> | Yes, N = 31 <sup>1</sup> | p-value <sup>2</sup> |
|-------------------------------------|----------------------------|--------------------------|----------------------|
| <b>Symptom Severity (0-30)</b>      | 18.3 (5.6)                 | 20.2 (6.0)               | 0.07                 |
| <b>Functional Disability (0-15)</b> | 7.1 (3.8)                  | 8.8 (4.5)                | 0.03                 |
| <b>Overall Health (0-10)</b>        | 4.5 (1.9)                  | 4.3 (2.2)                | 0.9                  |

<sup>1</sup>Mean (Standard Deviation); <sup>2</sup>Mann-Whitney-Wilcoxon rank sum test; Missing values, N=8
